# Supplementary material for: An epigenetic predictor of death captures multi-modal measures of brain health
Source: bioRxiv or medRxiv preprint supplement (doi:10.1101/703504), 2019-07-16
Supplement: Supplementary file [file media-3.pdf]

*Supplementary Note 2. The association of age-adjusted DNAm Pack Years and DNAm blood proteins with physical, cognitive, neuroimaging and protein traits in the LBC1936 study.*

## **DNAm Pack Years**

### *Physical*

In relation to physical and blood traits, age-adjusted DNAm Pack Years was positively associated with levels of interleukin-6 ( $\beta = 0.25$ , SE = 0.04,  $P = 1.6 \times 10^{-9}$ ), C-reactive protein ( $\beta = 0.18$ , SE = 0.04,  $P = 4.3 \times 10^{-5}$ ), creatinine ( $\beta = 0.13$ , SE = 0.04,  $P = 2.0 \times 10^{-3}$ ) and triglycerides ( $\beta = 0.11$ , SE = 0.04,  $P = 0.02$ ). As with DNAm GrimAge, only the association with triglyceride concentration failed to remain significant after adjusting for age 11 IQ (% attenuation: 42.08%).

Age-adjusted DNAm Pack Years was negatively associated with all four measures of lung function ( $\beta = [-0.11 \text{ to } -0.23]$  SE = [0.03 to 0.04],  $P = [1.0 \times 10^{-3} \text{ to } 2.0 \times 10^{-13}]$ ), levels of iron ( $\beta = -0.16$ , SE = 0.04,  $P = 1.0 \times 10^{-3}$ ), low-density lipoprotein cholesterol ( $\beta = -0.10$ , SE = 0.04,  $P = 0.03$ ), and height ( $\beta = -0.07$ , SE = 0.03,  $P = 0.04$ ). Only the association with height failed to remain significant following controlling for childhood cognitive ability (% attenuation 34.33%).

### *Cognitive*

Following adjustment for age 11 IQ, age-adjusted DNAm Pack Years was significantly associated with the g factor ( $\beta = -0.08$ , SE = 0.03,  $P = 0.03$ ), lower scores on the digit symbol coding ( $\beta = -0.11$ , SE = 0.04,  $P = 0.01$ ) and symbol search tasks ( $\beta = -0.10$ , SE = 0.04,  $P = 0.02$ ) and an increased mean four choice reaction time ( $\beta = 0.12$ , SE = 0.04,  $P = 6.0 \times 10^{-3}$ ).

### *Neuroimaging*

Age-adjusted DNAm Pack Years was negatively associated with ratios of white matter volume:ICV ( $\beta = -0.25$ , SE = 0.04,  $P = 3.0 \times 10^{-7}$ ), brain volume:ICV ( $\beta = -0.19$ , SE = 0.04,  $P = 6.0 \times 10^{-5}$ ), grey matter volume:ICV ( $\beta = -0.16$ , SE = 0.04,  $P = 1.0 \times 10^{-3}$ ). Furthermore, age-adjusted DNAm Pack Years was positively associated with the ratio of white matter hyperintensities:ICV ( $\beta = 0.16$ , SE = 0.04,  $P = 2.0 \times 10^{-3}$ ). All associations remained significant after adjusting for age 11 IQ.

*Protein*

DNAm Pack Years was significantly associated with the levels of 30/92 Olink® proteins, 24 of these associations remained significant following adjustment for age 11 IQ (Supplementary File 5a).

## **DNAm Adrenomedullin**

### *Physical*

In relation to physical and blood traits, age-adjusted DNAm Adrenomedullin (ADM) was positively associated with levels of interleukin-6 ( $\beta = 0.30$ , SE = 0.04,  $P = 8.6 \times 10^{-10}$ ), C-reactive protein ( $\beta = 0.15$ , SE = 0.04,  $P = 0.01$ ), higher body mass index ( $\beta = 0.21$ , SE = 0.04,  $P = 1.7 \times 10^{-4}$ ) and weight ( $\beta = 0.13$ , SE = 0.04,  $P = 0.01$ ). All associations remained significant after adjusting for age 11 IQ.

Age-adjusted DNAm ADM was negatively associated with three measures of lung function: peak expiratory flow ( $\beta = -0.12$ , SE = 0.04,  $P = 0.01$ ), forced expiratory volume ( $\beta = -0.10$ , SE = 0.03,  $P = 0.02$ ), forced vital capacity ( $\beta = -0.10$ , SE = 0.03,  $P = 0.02$ ) and levels of iron ( $\beta = -0.16$ , SE = 0.05,  $P = 0.01$ ). All associations remained significant after adjusting for age 11 IQ.

### *Cognitive*

Following adjustment for age 11 IQ, age-adjusted ADM was significantly associated with the g factor ( $\beta = -0.10$ , SE = 0.04,  $P = 0.03$ ).

### *Neuroimaging*

Age-adjusted DNAm ADM was not significantly associated with any neuroimaging phenotype.

### *Protein*

DNAm ADM was significantly associated with the levels of 16/92 Olink® proteins, 15 of these associations remained significant following adjustment for age 11 IQ (Supplementary File 5b).

## **DNAm Beta-2 microglobulin**

### *Physical*

Age-adjusted DNAm Beta-2 microglobulin (B2M) was positively associated with levels of interleukin-6 ( $\beta = 0.16$ , SE = 0.04, P =  $3.0 \times 10^{-3}$ ).

### *Cognitive*

Age-adjusted DNAm B2M was not significantly associated with any cognitive phenotype.

### *Neuroimaging*

Age-adjusted DNAm B2M was negatively associated with the ratios of grey matter volume:ICV ( $\beta = -0.16$ , SE = 0.04, P =  $7.0 \times 10^{-3}$ ) and brain volume:ICV ( $\beta = -0.16$ , SE = 0.04, P =  $7.0 \times 10^{-3}$ ).

### *Protein*

DNAm B2M was significantly associated with the levels of 6/92 Olink® proteins, 5 of these associations remained significant following adjustment for age 11 IQ (SIGLEC1, MSR1, IL12, SCARB2 and Beta NGF) (Supplementary File 5c).

## **DNAm Cystatin C**

### *Physical*

Age-adjusted DNAm Cystatin C was positively associated with levels of interleukin-6 ( $\beta = 0.14$ , SE = 0.04,  $P = 5.0 \times 10^{-3}$ ) and body mass index ( $\beta = 0.14$ , SE = 0.04,  $P = 5.0 \times 10^{-3}$ ).

Age-adjusted DNAm Cystatin C was negatively associated with levels of low-density lipoprotein cholesterol ( $\beta = -0.14$ , SE = 0.04,  $P = 5.0 \times 10^{-3}$ ), total cholesterol ( $\beta = -0.12$ , SE = 0.04,  $P = 0.01$ ), iron ( $\beta = -0.14$ , SE = 0.04,  $P = 0.01$ ) as well as forced vital capacity ( $\beta = -0.08$ , SE = 0.04,  $P = 0.04$ ). All associations remained significant following controlling for age 11 IQ.

### *Cognitive*

After adjusting for age 11 IQ, age-adjusted DNAm Cystatin C was negatively associated with the g factor ( $\beta = -0.09$ , SE = 0.03,  $P = 0.04$ ).

### *Neuroimaging*

Age-adjusted DNAm Cystatin C was negatively associated with the ratios of grey matter volume:ICV ( $\beta = -0.20$ , SE = 0.04,  $P = 8.6 \times 10^{-5}$ ), brain volume:ICV ( $\beta = -0.20$ , SE = 0.04,  $P = 2.5 \times 10^{-4}$ ) and white matter volume:ICV ( $\beta = -0.14$ , SE = 0.04,  $P = 0.02$ ). All associations were significant after correcting for age 11 IQ.

### *Protein*

DNAm Cystatin C was significantly associated with the levels of 3/92 Olink® proteins, all of which remained significant following adjustment for age 11 IQ (G CSF, SIGLEC9 and MSR1) (Supplementary File 5d).

## **DNAm Growth Differentiation Factor 15**

### *Physical*

Age-adjusted DNAm Growth Differentiation Factor 15 (GDF15) was not associated with any physical phenotype.

### *Cognitive*

Age-adjusted DNAm GDF15 was not associated with any cognitive phenotype.

### *Neuroimaging*

Age-adjusted DNAm GDF15 was not associated with any neuroimaging phenotype.

### *Protein*

DNAm GDF15 was not significantly associated with the levels of any Olink® protein (Supplementary File 5e).

## **DNAm Leptin**

### *Physical*

Age-adjusted DNAm Leptin was positively associated with levels of interleukin-6 ( $\beta = 0.25$ , SE = 0.07, P = 0.01) and body mass index ( $\beta = 0.24$ , SE = 0.04, P = 0.01). After adjusting for age 11 IQ, the association between age-adjusted DNAm Leptin and body mass index did not remain significant ( $\beta = -0.21$ , SE = 0.07, P = 0.05; % attenuation: 14.71%).

Age-adjusted DNAm Leptin was negatively associated with grip strength in the left hand ( $\beta = -0.13$ , SE = 0.02, P = 0.04).

### *Cognitive*

Before adjusting for age 11 IQ, age-adjusted DNAm Leptin was negatively associated with the Wechsler test of adult reading ( $\beta = -0.20$ , SE = 0.07, P = 0.04). However, this association was attenuated following adjustment for age 11 IQ (% attenuation: 36.48%).

### *Neuroimaging*

Age-adjusted DNAm Leptin was negatively associated with the ratios of brain volume:ICV ( $\beta = -0.30$ , SE = 0.07, P =  $9.0 \times 10^{-3}$ ) and grey matter volume:ICV ( $\beta = -0.23$ , SE = 0.08, P = 0.04). After adjusting for age 11 IQ, the association between DNAm Leptin and grey matter volume:ICV did not remain significant ( $\beta = -0.21$ , SE = 0.08, P = 0.08; % attenuation: 9.21%).

### *Protein*

DNAm Leptin was significantly associated with the levels of 4/92 Olink<sup>®</sup> proteins, all of which remained significant following adjustment for age 11 IQ (Beta NGF, SCARB2, EFNA4 and MSR1) (Supplementary File 5f).

## **DNAm Plasminogen activator inhibitor-1**

### *Physical*

Age-adjusted DNAm Plasminogen activator inhibitor-1 (PAI1) was positively associated with levels of triglycerides ( $\beta = 0.28$ , SE = 0.04,  $P = 1.3 \times 10^{-9}$ ), body mass index ( $\beta = 0.28$ , SE = 0.04,  $P = 1.5 \times 10^{-9}$ ), levels of interleukin-6 ( $\beta = 0.27$ , SE = 0.04,  $P = 2.1 \times 10^{-9}$ ), weight ( $\beta = 0.21$ , SE = 0.04,  $P = 8.2 \times 10^{-7}$ ) and levels of C-reactive protein ( $\beta = 0.19$ , SE = 0.04,  $P = 6.4 \times 10^{-5}$ ).

Age-adjusted DNAm PAI1 was negatively associated with three measures of lung function: forced vital capacity volume ( $\beta = -0.19$ , SE = 0.03,  $P = 7.6 \times 10^{-9}$ ), forced expiratory volume ( $\beta = -0.18$ , SE = 0.03,  $P = 1.4 \times 10^{-7}$ ), peak expiratory flow ( $\beta = -0.11$ , SE = 0.03,  $P = 0.01$ ) as well as levels of low-density lipoprotein cholesterol ( $\beta = -0.21$ , SE = 0.04,  $P = 3.3 \times 10^{-6}$ ), total cholesterol ( $\beta = -0.14$ , SE = 0.04,  $P = 3.0 \times 10^{-3}$ ), high-density lipoprotein cholesterol ( $\beta = -0.12$ , SE = 0.04,  $P = 0.02$ ) and grip strength in the left hand ( $\beta = -0.07$ , SE = 0.03,  $P = 0.03$ ). Only the association between age-adjusted DNAm PAI1 and high-density lipoprotein cholesterol did not remain significant after adjusting for age 11 IQ.

### *Cognitive*

After adjusting for age 11 IQ, age-adjusted DNAm PAI1 was not associated with any cognitive phenotype.

### *Neuroimaging*

Age-adjusted DNAm PAI1 was negatively associated with the ratios of brain volume:ICV ( $\beta = -0.24$ , SE = 0.04,  $P = 8.2 \times 10^{-10}$ ), grey matter volume:ICV ( $\beta = -0.21$ , SE = 0.05,  $P = 6.4 \times 10^{-5}$ ) and white matter volume:ICV ( $\beta = -0.16$ , SE = 0.04,  $P = 3.0 \times 10^{-3}$ ). After adjusting for age 11 IQ, all associations remained significant.

### *Protein*

DNAm PAI1 was significantly associated with the levels of 21/92 Olink® proteins, 19 of these associations remained significant following adjustment for age 11 IQ. Additionally, a further three



proteins were significantly associated with DNAm PAI1 after adjusting for age 11 IQ (G CSF, KYNU and THY1) (Supplementary File 5g).

## **DNAm Tissue inhibitor of metalloproteinases 1**

### *Physical*

Age-adjusted DNAm Tissue inhibitor of metalloproteinases 1 (TIMP1) was positively associated with levels of C-reactive protein ( $\beta = 0.15$ , SE = 0.04,  $P = 3.0 \times 10^{-3}$ ), interleukin-6 ( $\beta = 0.16$ , SE = 0.04,  $P = 3.0 \times 10^{-3}$ ), creatinine ( $\beta = 0.11$ , SE = 0.04,  $P = 0.02$ ) and body mass index ( $\beta = 0.10$ , SE = 0.04,  $P = 0.04$ ).

Age-adjusted DNAm TIMP1 was negatively associated with levels of iron ( $\beta = -0.17$ , SE = 0.04,  $P = 3.0 \times 10^{-3}$ ), forced expiratory volume ( $\beta = -0.10$ , SE = 0.03,  $P = 9.0 \times 10^{-3}$ ), peak expiratory flow ( $\beta = -0.10$ , SE = 0.03,  $P = 0.01$ ). All associations remained significant after adjusting for age 11 IQ.

### *Cognitive*

Age-adjusted DNAm TIMP1 was not associated with any cognitive phenotype.

### *Neuroimaging*

Age-adjusted DNAm TIMP1 was not associated with any neuroimaging phenotype.

### *Protein*

DNAm TIMP1 was significantly associated with the levels of 16/92 Olink® proteins, 15 of these associations remained significant following adjustment for age 11 IQ. Additionally, a further two proteins were significantly associated with DNAm TIMP1 after adjusting for age 11 IQ (EFNA4 and LAYN) (Supplementary File 5h).
